# Supplementary material for: Detection of Peanut Allergen by Real-Time PCR: Looking for a Suitable Detection Marker as Affected by Processing
Source: MDPI journal article supplement (doi:10.3390/foods10061421), 2021-06-18
Supplement: s1 [file s1]

**Table S1.** Preparation of binary mixtures of peanut in spelt wheat flours.

| Mixture | %       | mg/kg   |
|---------|---------|---------|
| S1      | 10      | 100,000 |
| S2      | 1       | 10,000  |
| S3      | 0.1     | 1,000   |
| S4      | 0.05    | 500     |
| S5      | 0.01    | 100     |
| S6      | 0.005   | 50      |
| S7      | 0.001   | 10      |
| S8      | 0.0001  | 1       |
| S9      | 0.00005 | 0.5     |
| S10     | 0.00001 | 0.1     |

**Table S2.** Primers used for sequencing purposes.

| <b>Oligo</b>         | <b>Sequence 5' → 3'</b>   | <b>Amplicon</b> |
|----------------------|---------------------------|-----------------|
| <b>trnH-psbA fw</b>  | ACATCCGCCCAAAGGAGAAAT     | 414             |
| <b>trnH-psbA rev</b> | TCTGGTTTACCGCGTTAGGT      |                 |
| <b>rpl 16 fw</b>     | GCGATGGGAACGACGAAAAC      | 493             |
| <b>rpl 16 rev</b>    | ACGGCTCCTCGCGAATAAAA      |                 |
| <b>mat k fw</b>      | TGGACTCGCCTCTGGTCAT       | 392             |
| <b>mat k rev</b>     | CCAGATGGATAGGATAGGGTATTCG |                 |
| <b>Ara h 6 fw</b>    | AGTACTCGATCCTCCGACCA      | 392             |
| <b>Ara h rev</b>     | AAGCCATAAGAGCACACCGAA     |                 |

**Table S3. Detection of mat K target by probe-based real-time PCR in untreated (control) and treated spiked samples.** DNA isolation protocol was DNeasy Plant Pro Kit (Qiagen, Protocol 1) for all samples.

| Peanut quantity (mg/kg) | Control <sup>1</sup>      | Boiling 60 min             | DIC 7b 120s                     |
|-------------------------|---------------------------|----------------------------|---------------------------------|
| 100000                  | 17.55 ± 0.17              | 18.69 ± 0.25 <sup>ns</sup> | 24.15 ± 0.29                    |
| 10000                   | 21.52 ± 0.30              | 23.30 ± 0.30 <sup>ns</sup> | 28.27 ± 0.62                    |
| 1000                    | 24.17 ± 0.17              | 26.15 ± 0.28               | 31.51 ± 1.14                    |
| 100                     | 27.89 ± 0.14              | 28.33 ± 0.25 <sup>ns</sup> | 34.62 ± 0.68                    |
| 10                      | 30.77 ± 0.25              | 33.36 ± 0.29               | 38.56 ± 0.33 <sup>†</sup>       |
| 1                       | 33.22 ± 0.20              | 34.17 ± 0.75               | 39.69 ± 0.25 (50%) <sup>†</sup> |
| 0.5                     | 32.74 ± 0.15 <sup>†</sup> | 36.47 ± 0.45               | N.A.                            |
| 0.1                     | 33.87 ± 0.58 <sup>†</sup> | N.A.                       | N.A.                            |
| Slope                   | -3.14                     | -3.17                      | -3.46                           |
| Efficiency (%)          | 108.30                    | 106.73                     | 94.43                           |
| R <sup>2</sup>          | 0.995                     | 0.982                      | 0.995                           |

  

| Peanut quantity (mg/kg) | AU121°C 15 min            | AU121°C 30 min                  | AU138°C 15 min                 | AU138°C 30 min     |
|-------------------------|---------------------------|---------------------------------|--------------------------------|--------------------|
| 100000                  | 20.93 ± 1.14              | 25.01 ± 0.28                    | 29.50 ± 0.13                   | 38.68 ± 0.89 (50%) |
| 10000                   | 24.84 ± 1.20              | 29.55 ± 0.33                    | 30.63 ± 0.05                   | 38.92 ± 0.72 (50%) |
| 1000                    | 28.23 ± 0.67              | 33.28 ± 0.29                    | 35.54 ± 0.06                   | 39.41 ± 0.40 (50%) |
| 100                     | 30.87 ± 0.78              | 35.39 ± 0.43                    | 37.09 ± 0.33 <sup>†</sup>      | 39.70 ± 0.34 (25%) |
| 10                      | 32.75 ± 0.21 <sup>†</sup> | 37.93 ± 0.49 <sup>†</sup>       | 39.6 ± 0.32 (75%) <sup>†</sup> | N.D.               |
| 1                       | 34.79 ± 1.01 <sup>†</sup> | 39.87 ± 0.15 <sup>†</sup> (25%) | N.D.                           | N.D.               |
| Slope                   | -3.32                     | -3.48                           | -3.02                          | --                 |
| Efficiency (%)          | 100.05                    | 93.65                           | 114.23                         | --                 |
| R <sup>2</sup>          | 0.993                     | 0.975                           | 0.885                          | --                 |

<sup>1</sup>Ct±SE

<sup>2</sup>Percentage of positive amplification

N.A. Not assayed

N.D. Signal was not detected after 40 cycles of amplification

<sup>†</sup>Detection is possible but Ct is not in the calibration curve.

<sup>ns</sup> Not significant differences in mean Ct values compared to untreated control (t-student, p >0.05).

```

1   AGTACTCGATCCTCCGACCAGCAACAG-AGGTGCTGCGATGAGCTGAACGAGATGGAGAA 59
1   AGTACTCGATCCTCCGACCAGCAACAGCAGGTGCTGCGATGAGCTGGACCAGATGGAGAA 60
60  CACACAGAGATGCATGTGCGAGGCATTGCAGCAGATAATGGAGAACCAGTGCGATAGGTT 119
61  CACAGAGAGATGCATGTGCGAGGCATTGCAGCAGATAATGGAGAACCAGTGCGATAGGTT 120
120 GCAGGACAGGCAAATGGTGCAGCAGTTCAAGAGAGAGCTCATGAACTTGCCCCAACAGTG 179
121 GCAGGACAGGCAAATGGTGCAGCAGTTCAAGAGGGAGCTCATGAACTTGCCTCAACAGTG 180
180 TAACTTTAGGGCAACACAGCGTTGCGATTGGACGTGAGTGGCGGCAGATGCTAGACTCA 239
181 TAACTTCAGGGCAACACAGCGTTGCGATTGGACGTGAGTGGCGGCAGATGCTAGACTCA 240
240 AAAATAATAATCTGTGCCAAAACAACTAGTAGGAAGTAGCTTATGAGCTATTATGTATG 299
241 AAAATAATAATCTGTGCCAAAAGAACTAGTAGGAAGTAGCTTATGAGCTATTATGTATG 300
300 CTTGTTTCGTTAATAATAAACATCATCACTGTATGAATGTGGTGATAGCTAGGTAAGGTT 359
301 CTTGTTTCGTTAATAATAAATATCATCACTGTATGAATGTGGTGA---TAGGTAAGGTT 356
360 ATATGAGCACCTTCGGTGTGCTCTTATGGCTT 391
357 ATATGAGCACCTTCGGTGTGCTCTTATGGCTT 388

```

**Figure S1. Sequence alignment of two clones of partial Ara h 6-allergen coding gene.** Primers and probe designed for real-time PCR experiment are squared in red and green respectively.

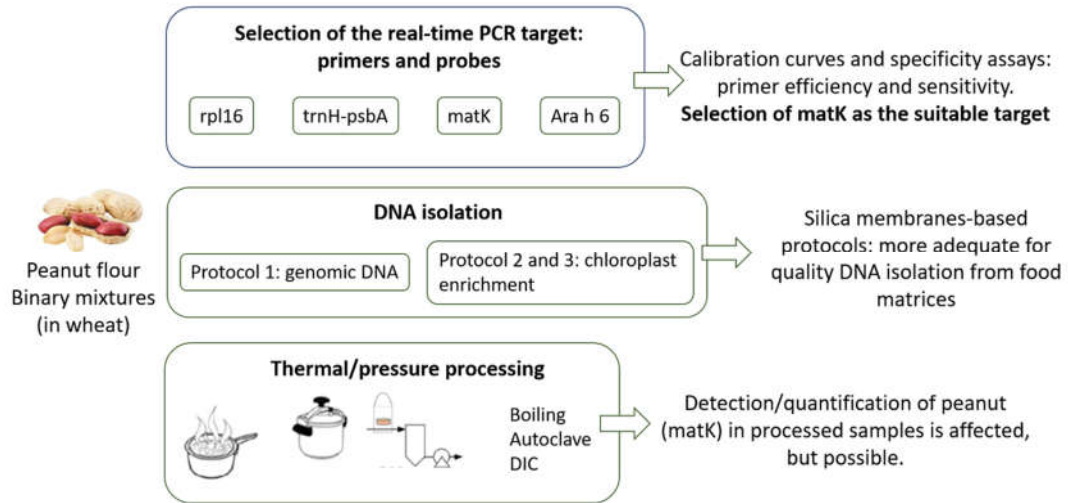

**Figure S2.** Workflow summarizing protocols, procedures, markers and the main findings of this study.
